# Supplementary material for: AutoML-based workflow for reliable DOE selection and reference studies for analyzing imprecise experimental data with machine learning
Source: Research Square preprint supplement (doi:10.21203/rs.3.rs-4964274/v1), 2024-09-23
Supplement: Supplementary file 1 [file 595592c9d3d4bcfb3d86fe7b.docx]

Supplementary Figures


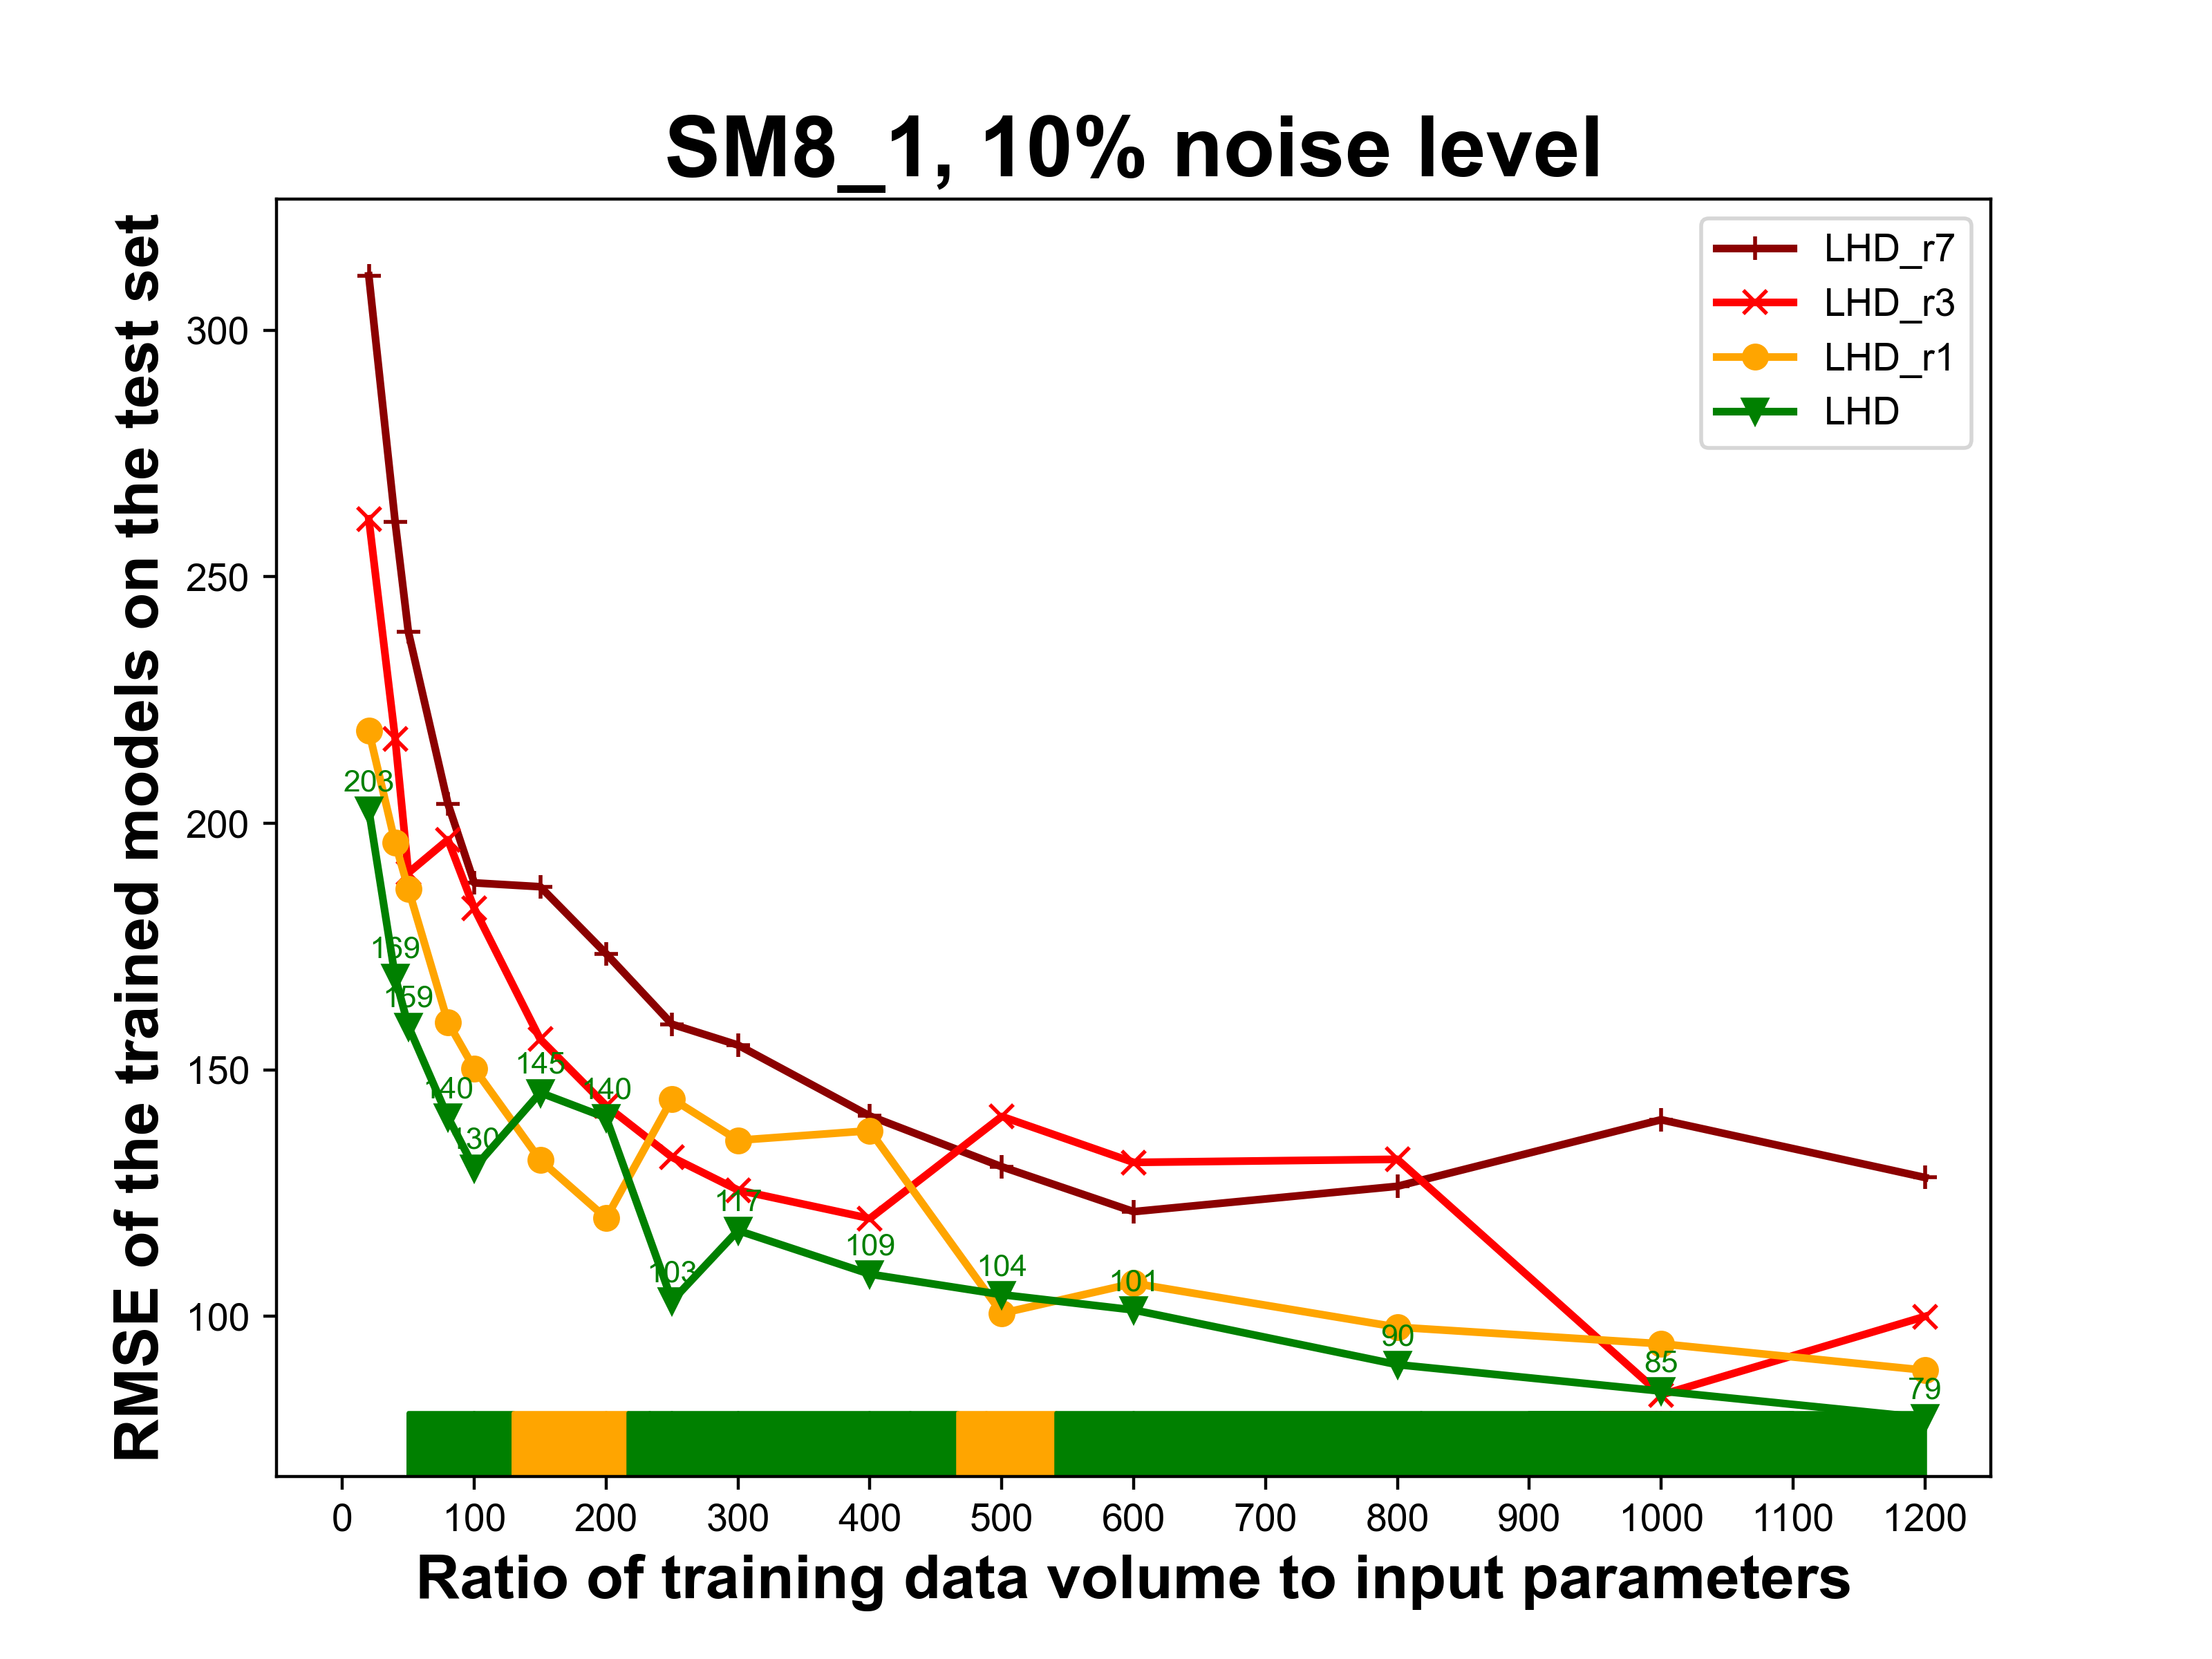


Supplementary Figure 1. Replication in data distribution versus only sampling with new data points, SM8_1, 10% noise level. The color bar illustrates the best performing DOE strategy.


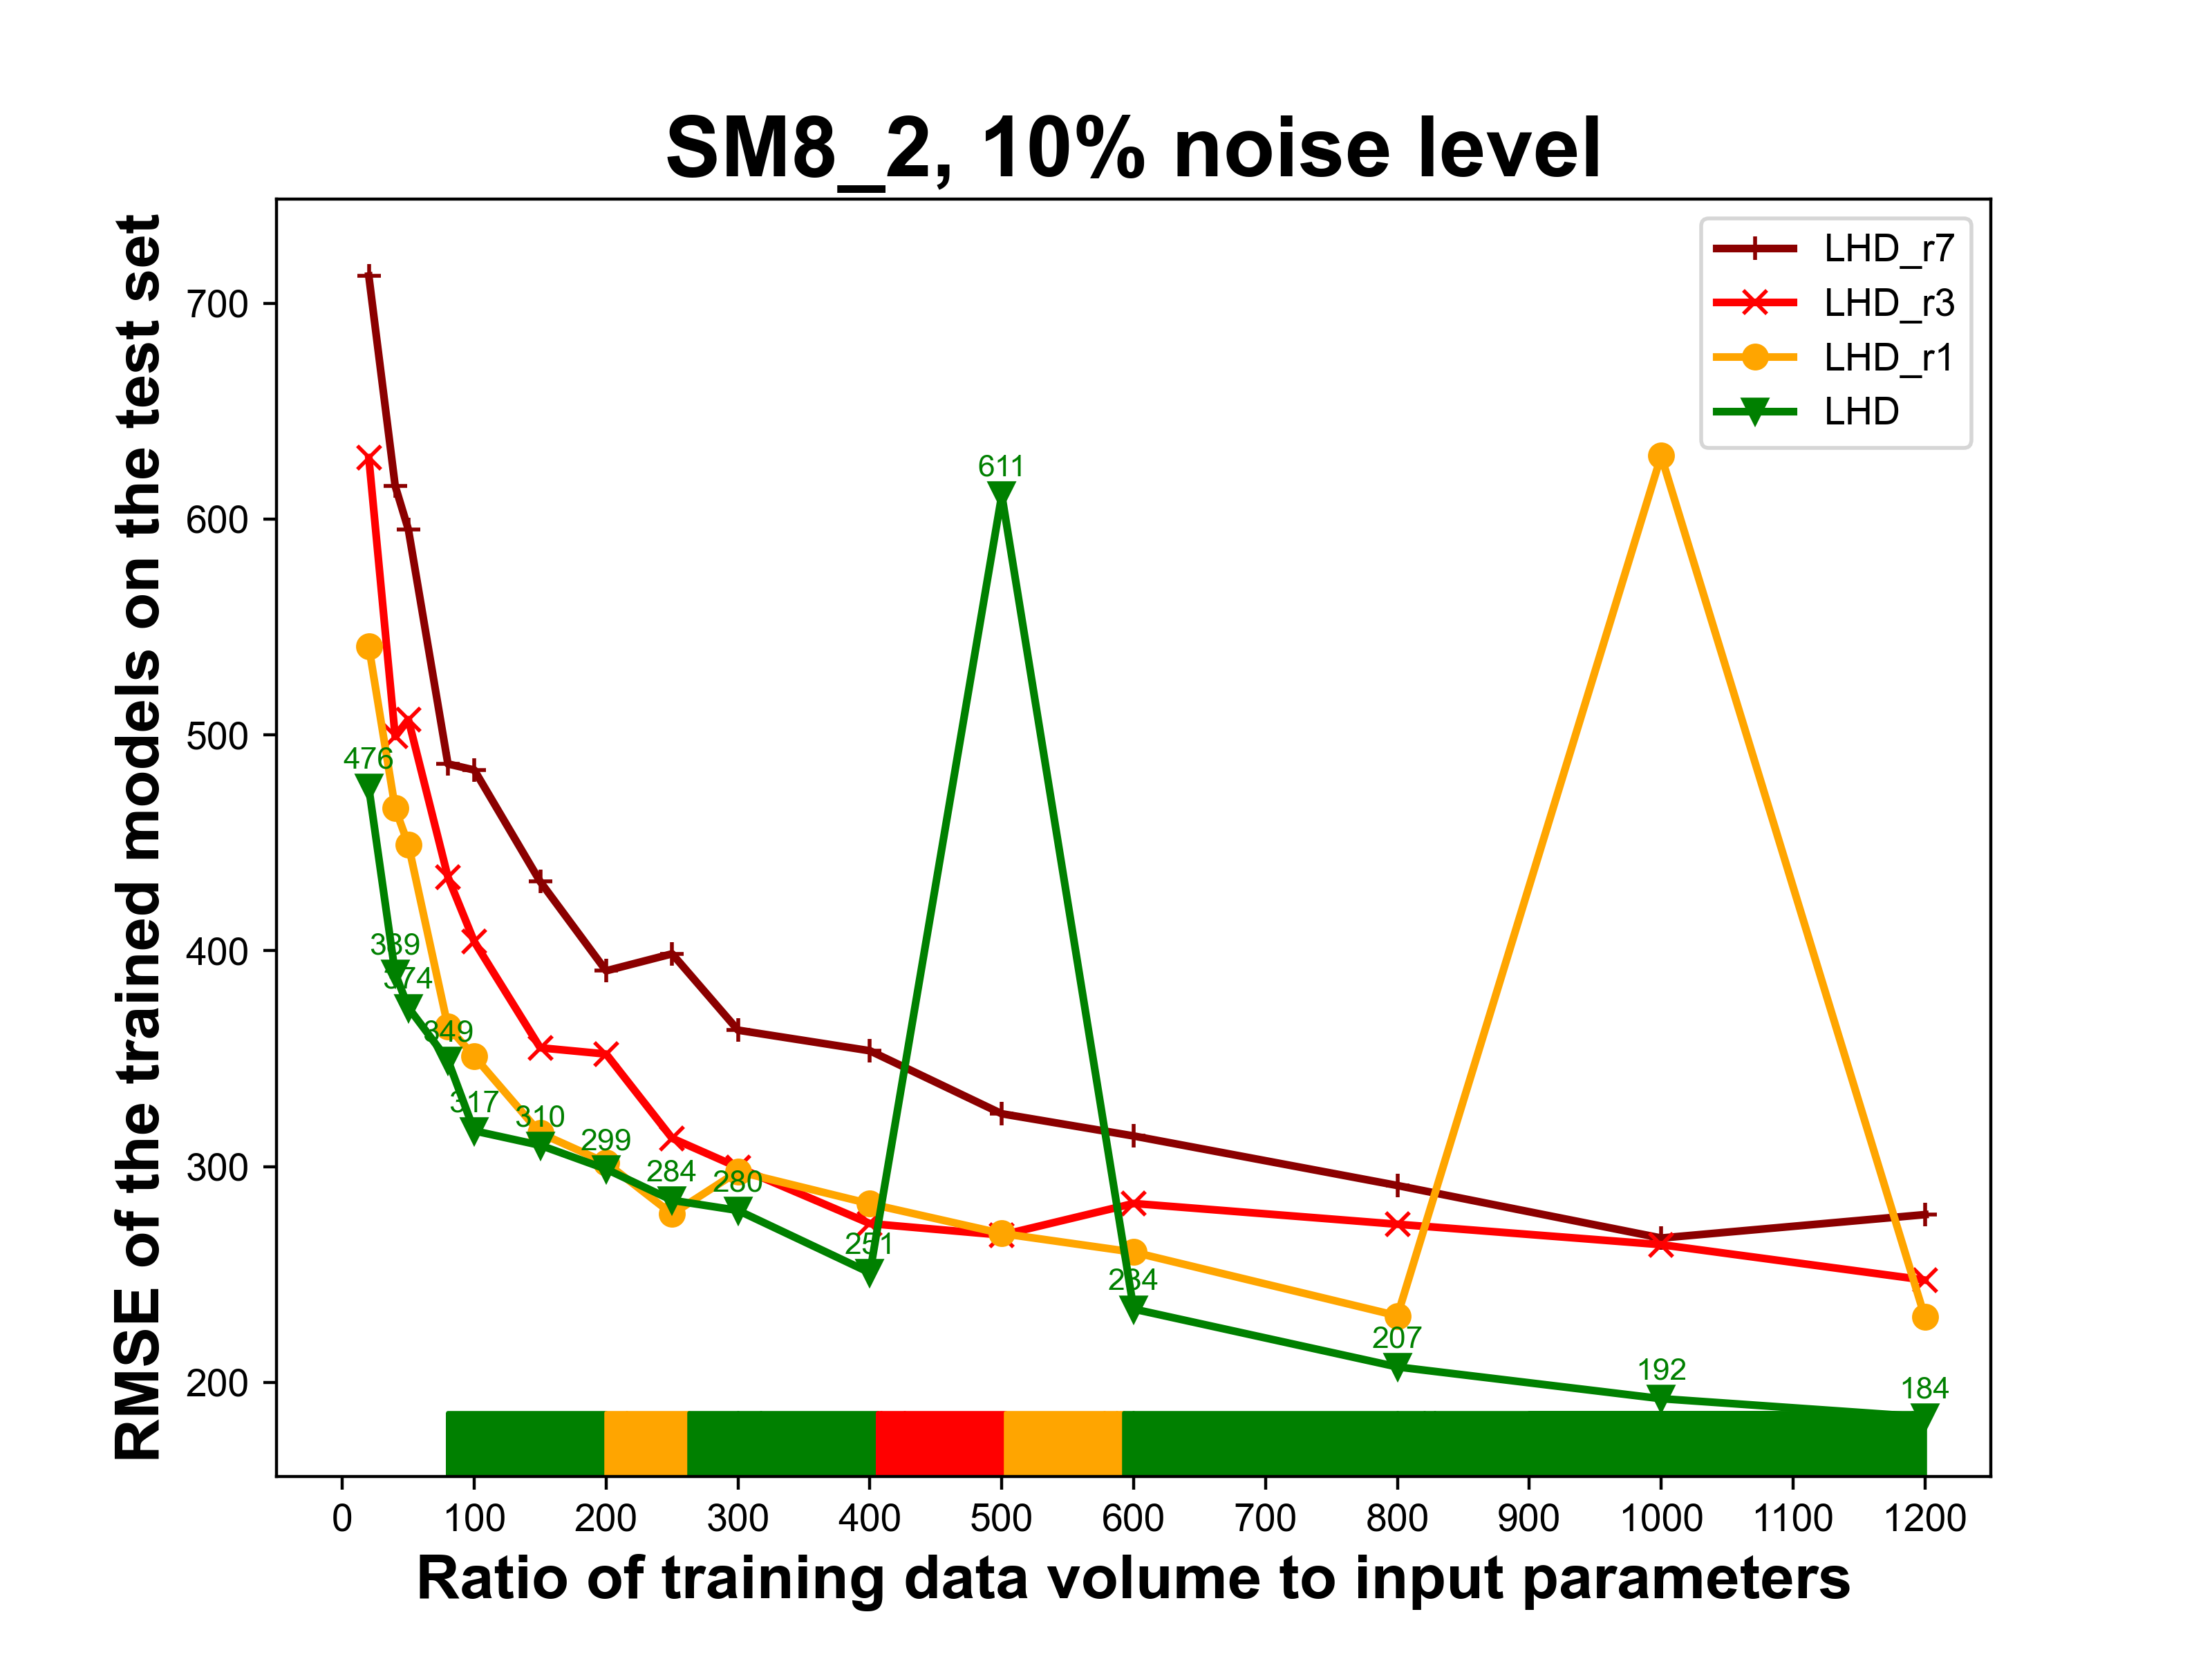


Supplementary Figure 2. Replication in data distribution versus only sampling with new data points, SM8_2, 10% noise level. The color bar illustrates the best performing DOE strategy.


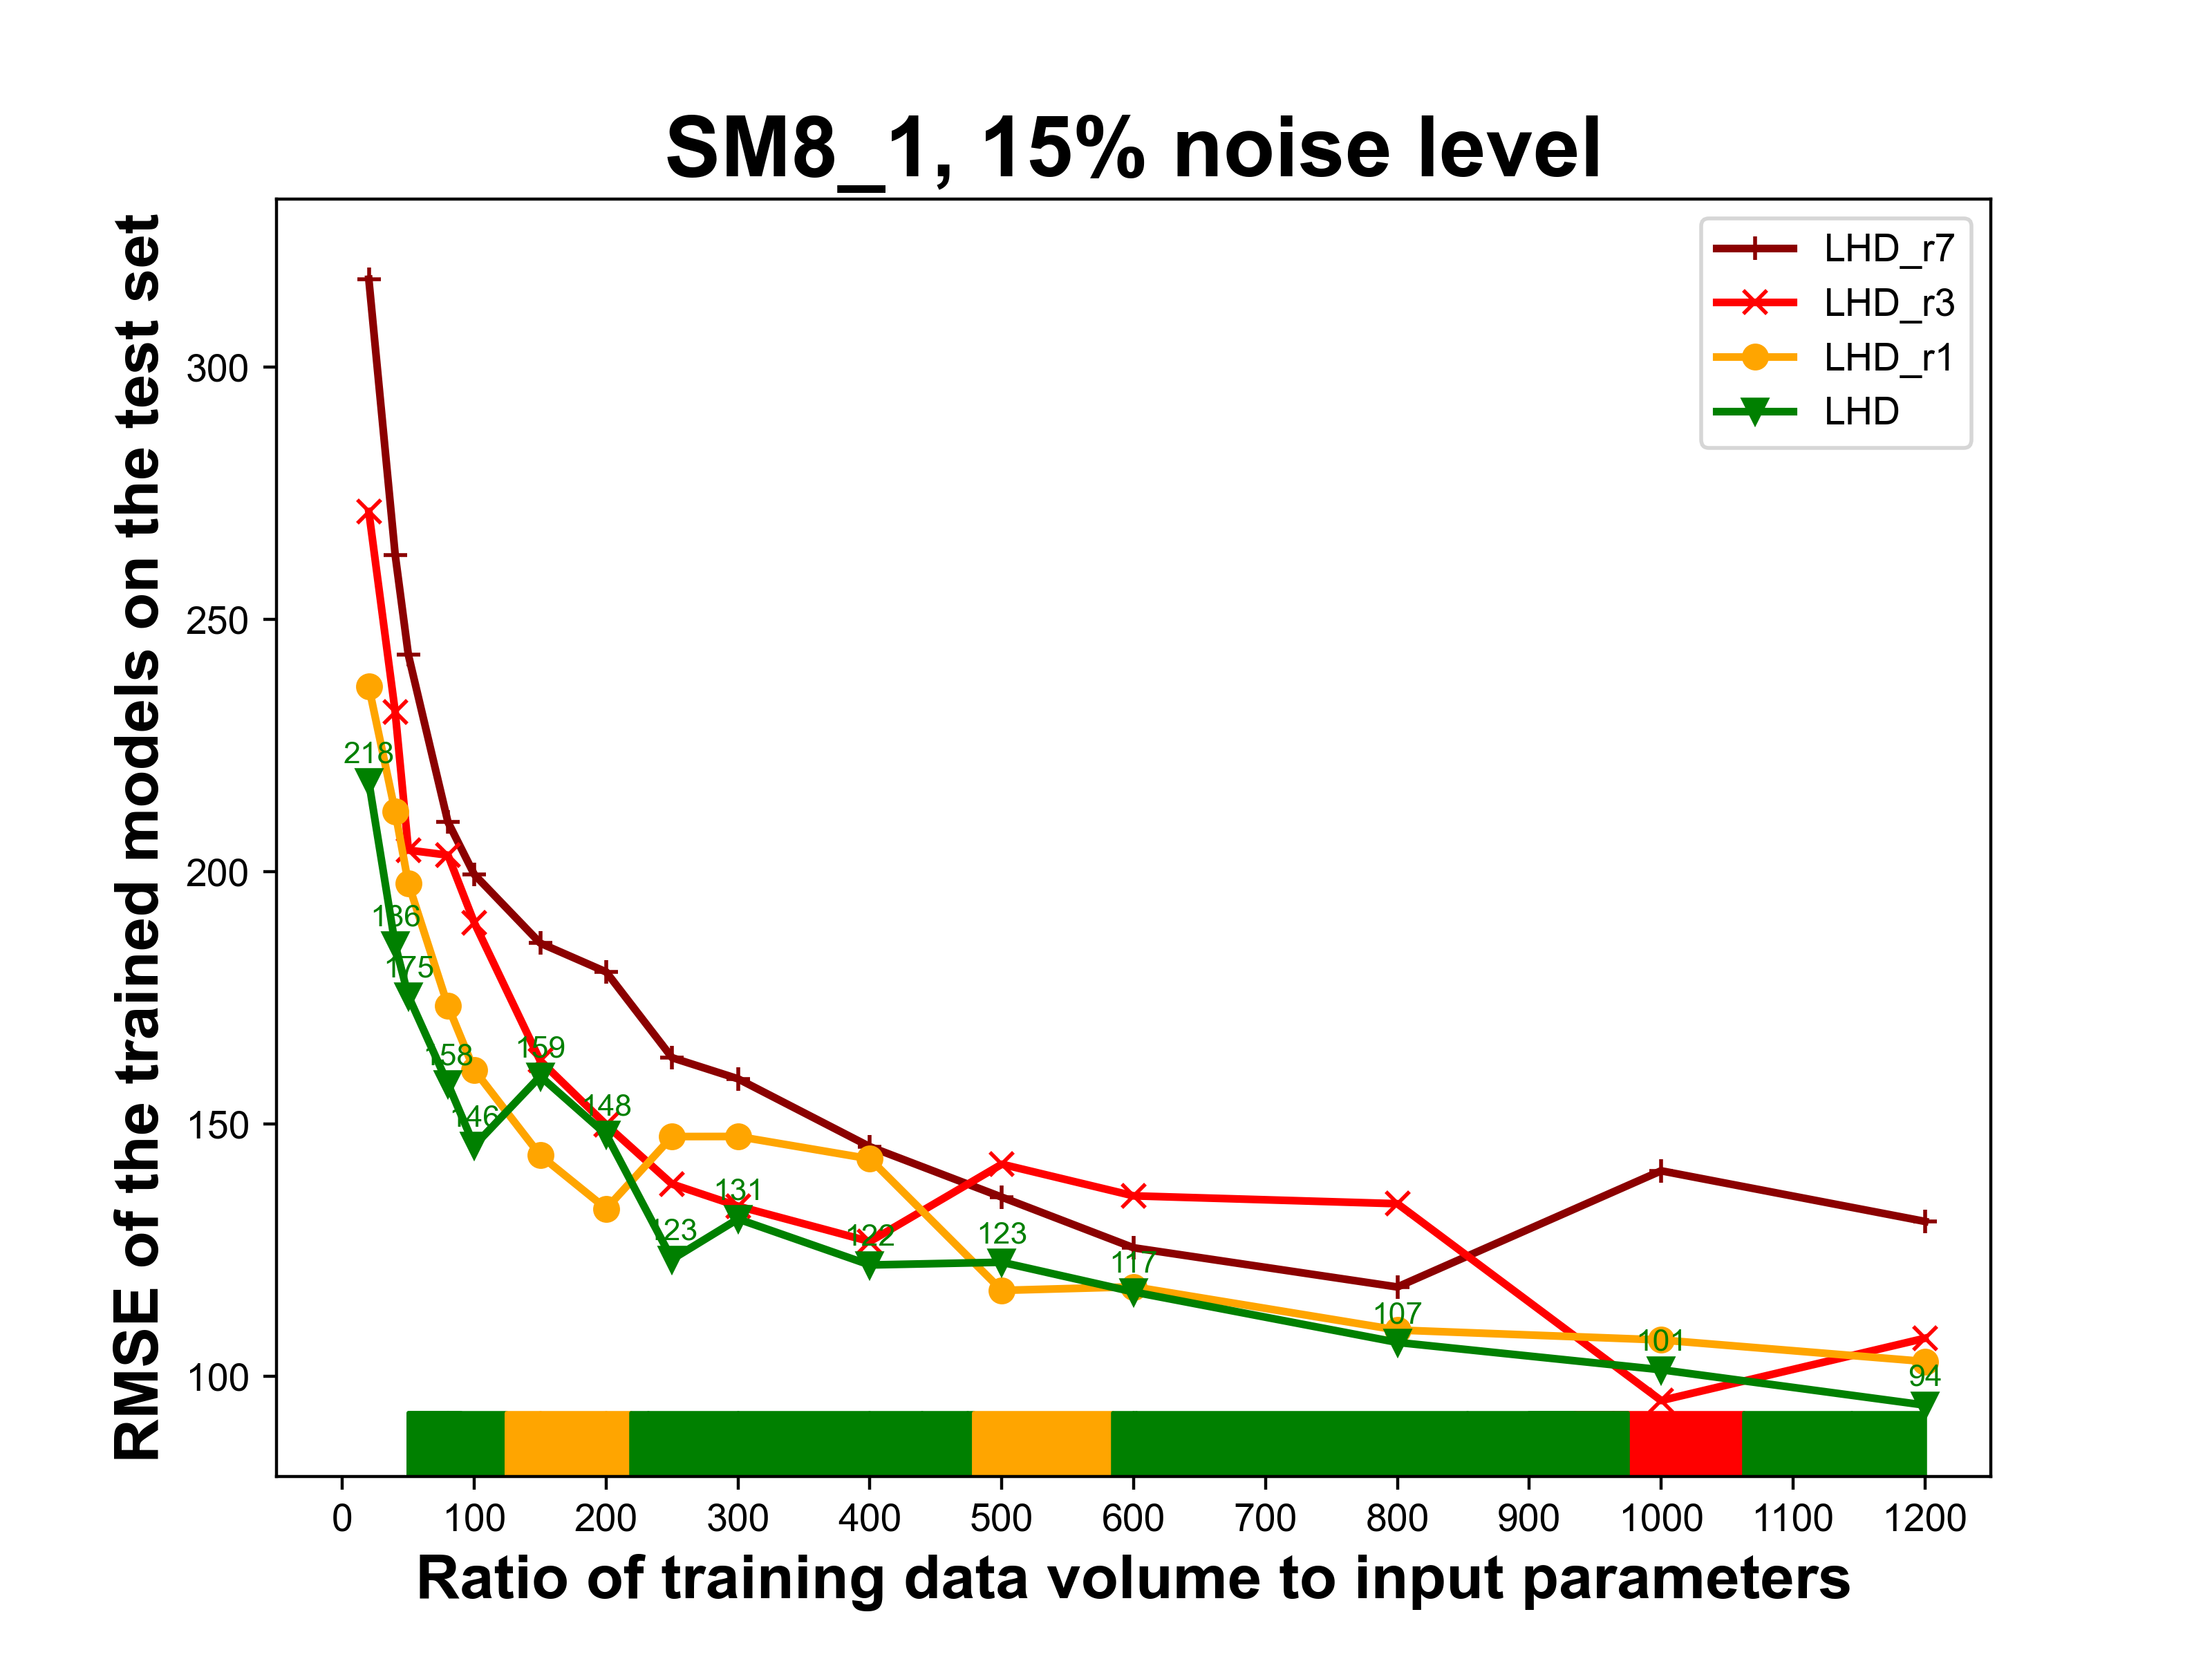


Supplementary Figure 3. Replication in data distribution versus only sampling with new data points, SM8_1, 15% noise level. The color bar illustrates the best performing DOE strategy.


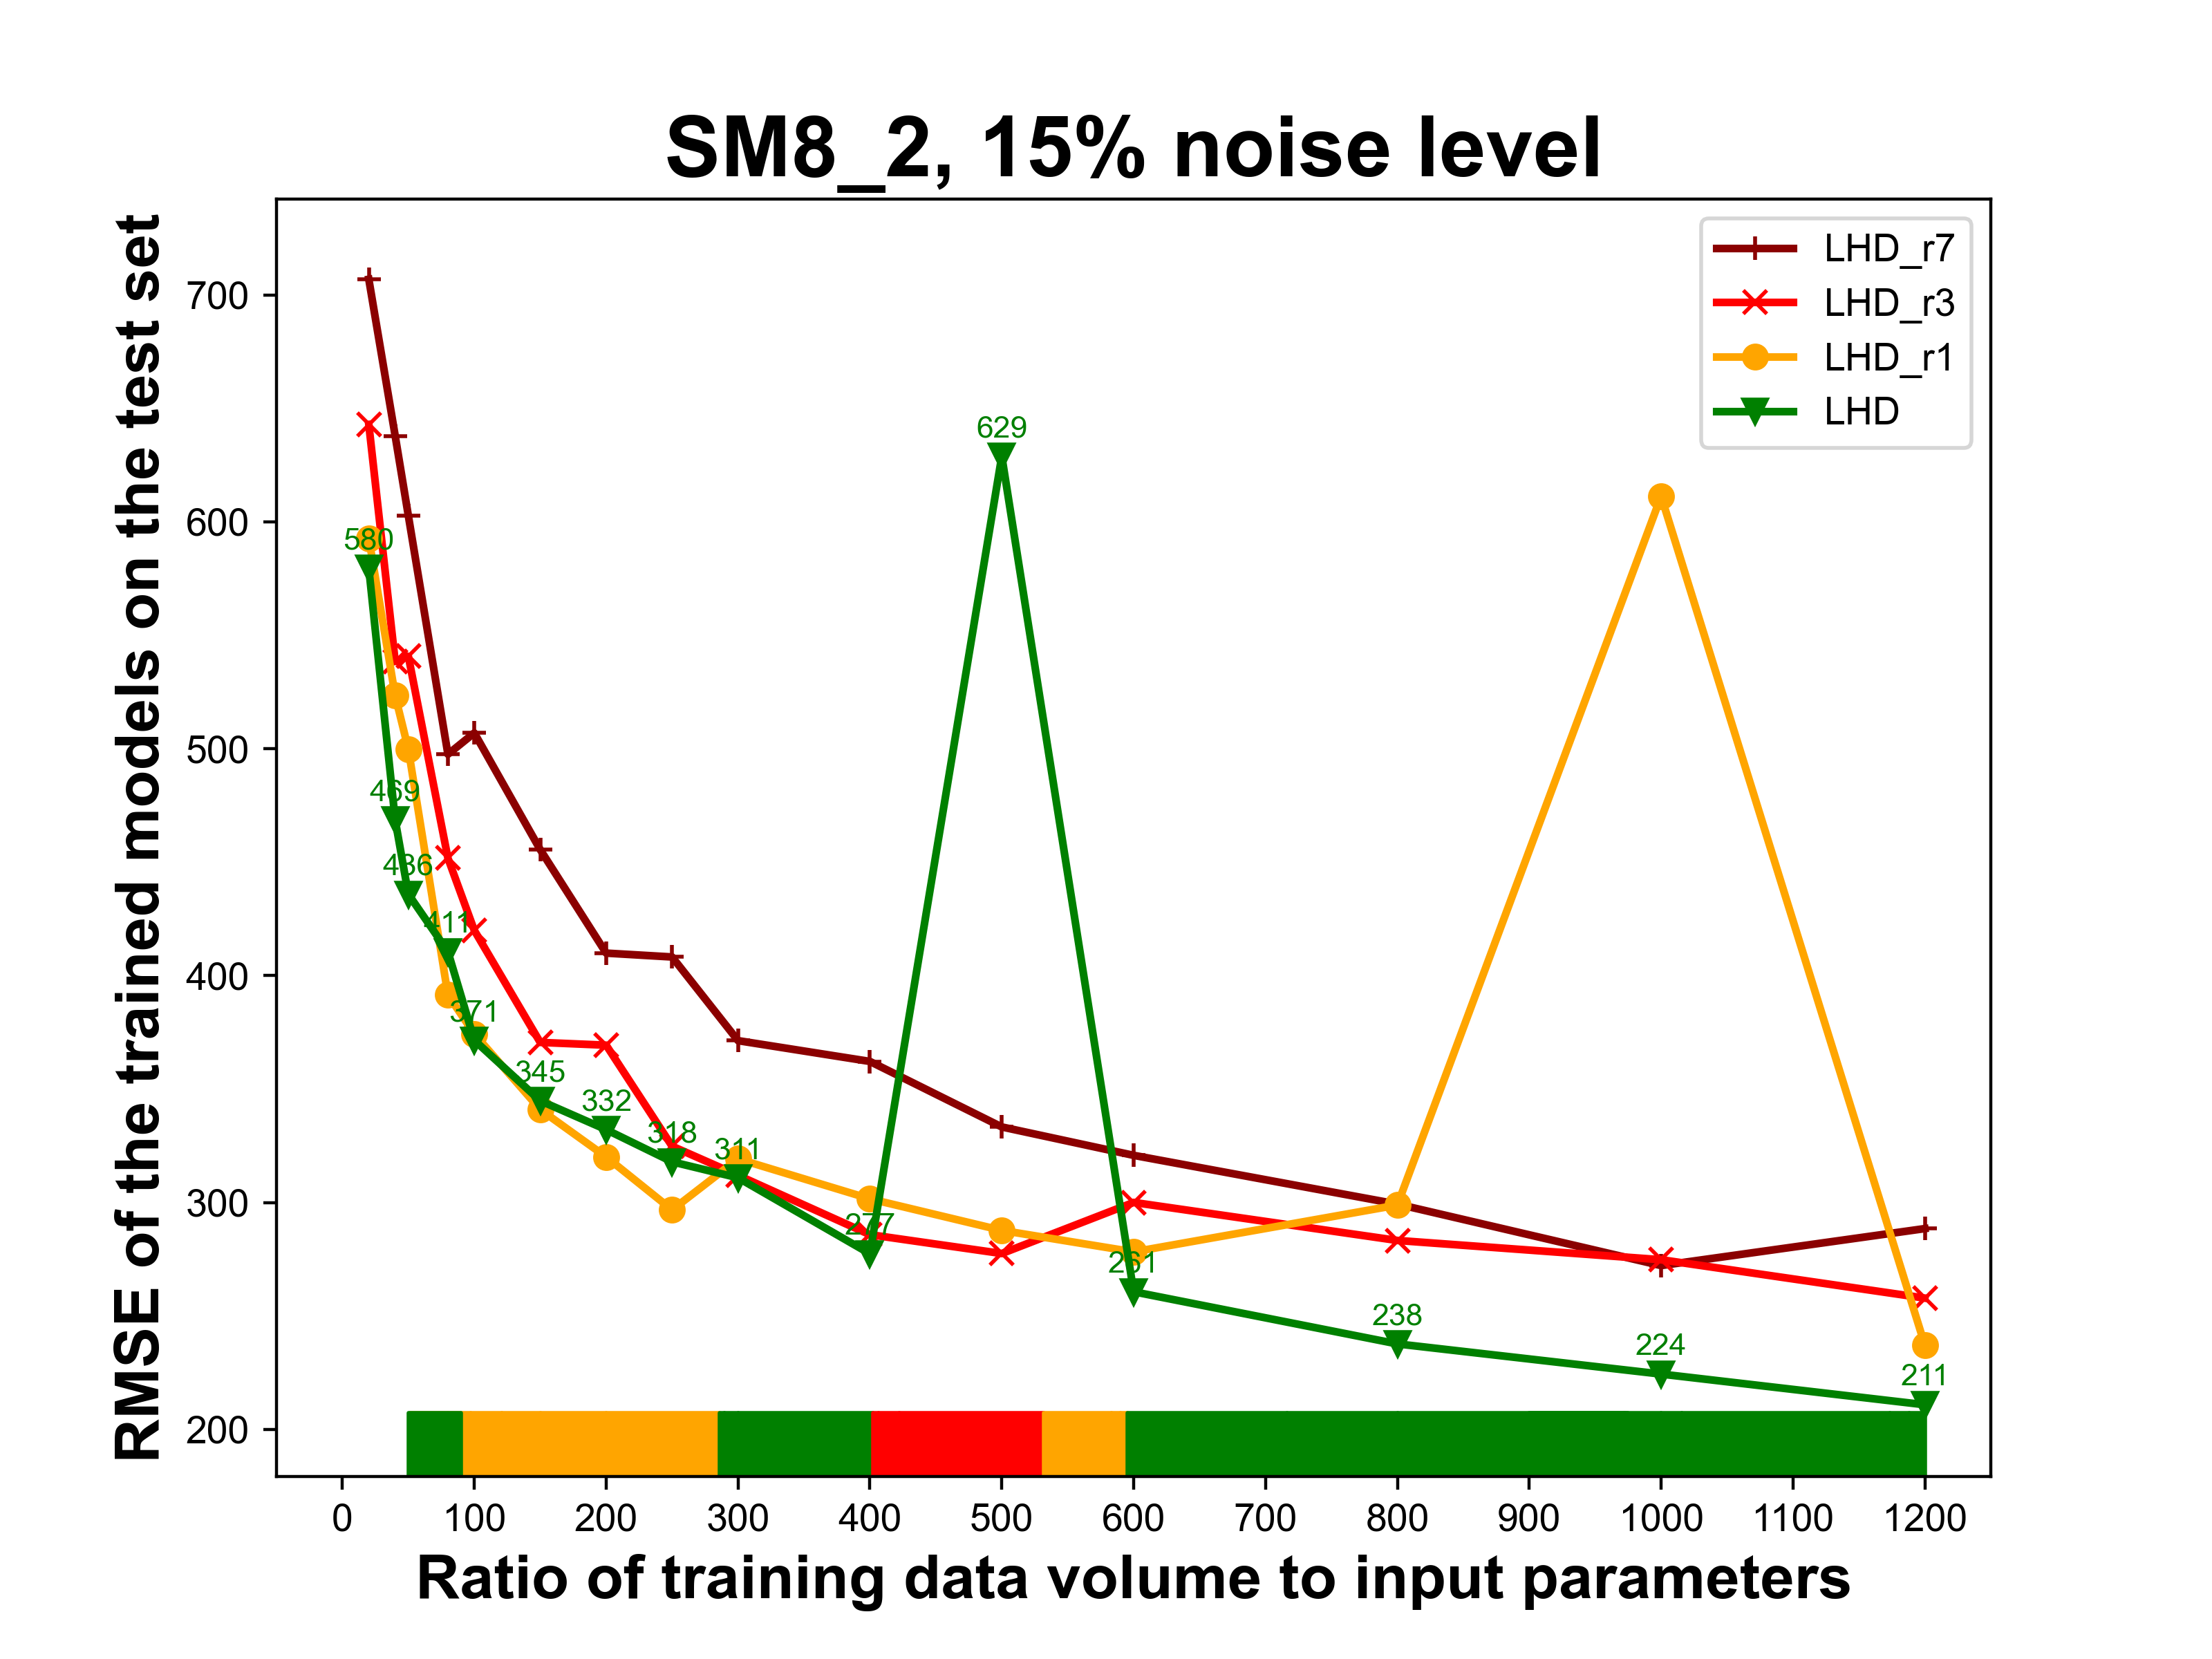


Supplementary Figure 4. Replication in data distribution versus only sampling with new data points, SM8_2, 15% noise level. The color bar illustrates the best performing DOE strategy.


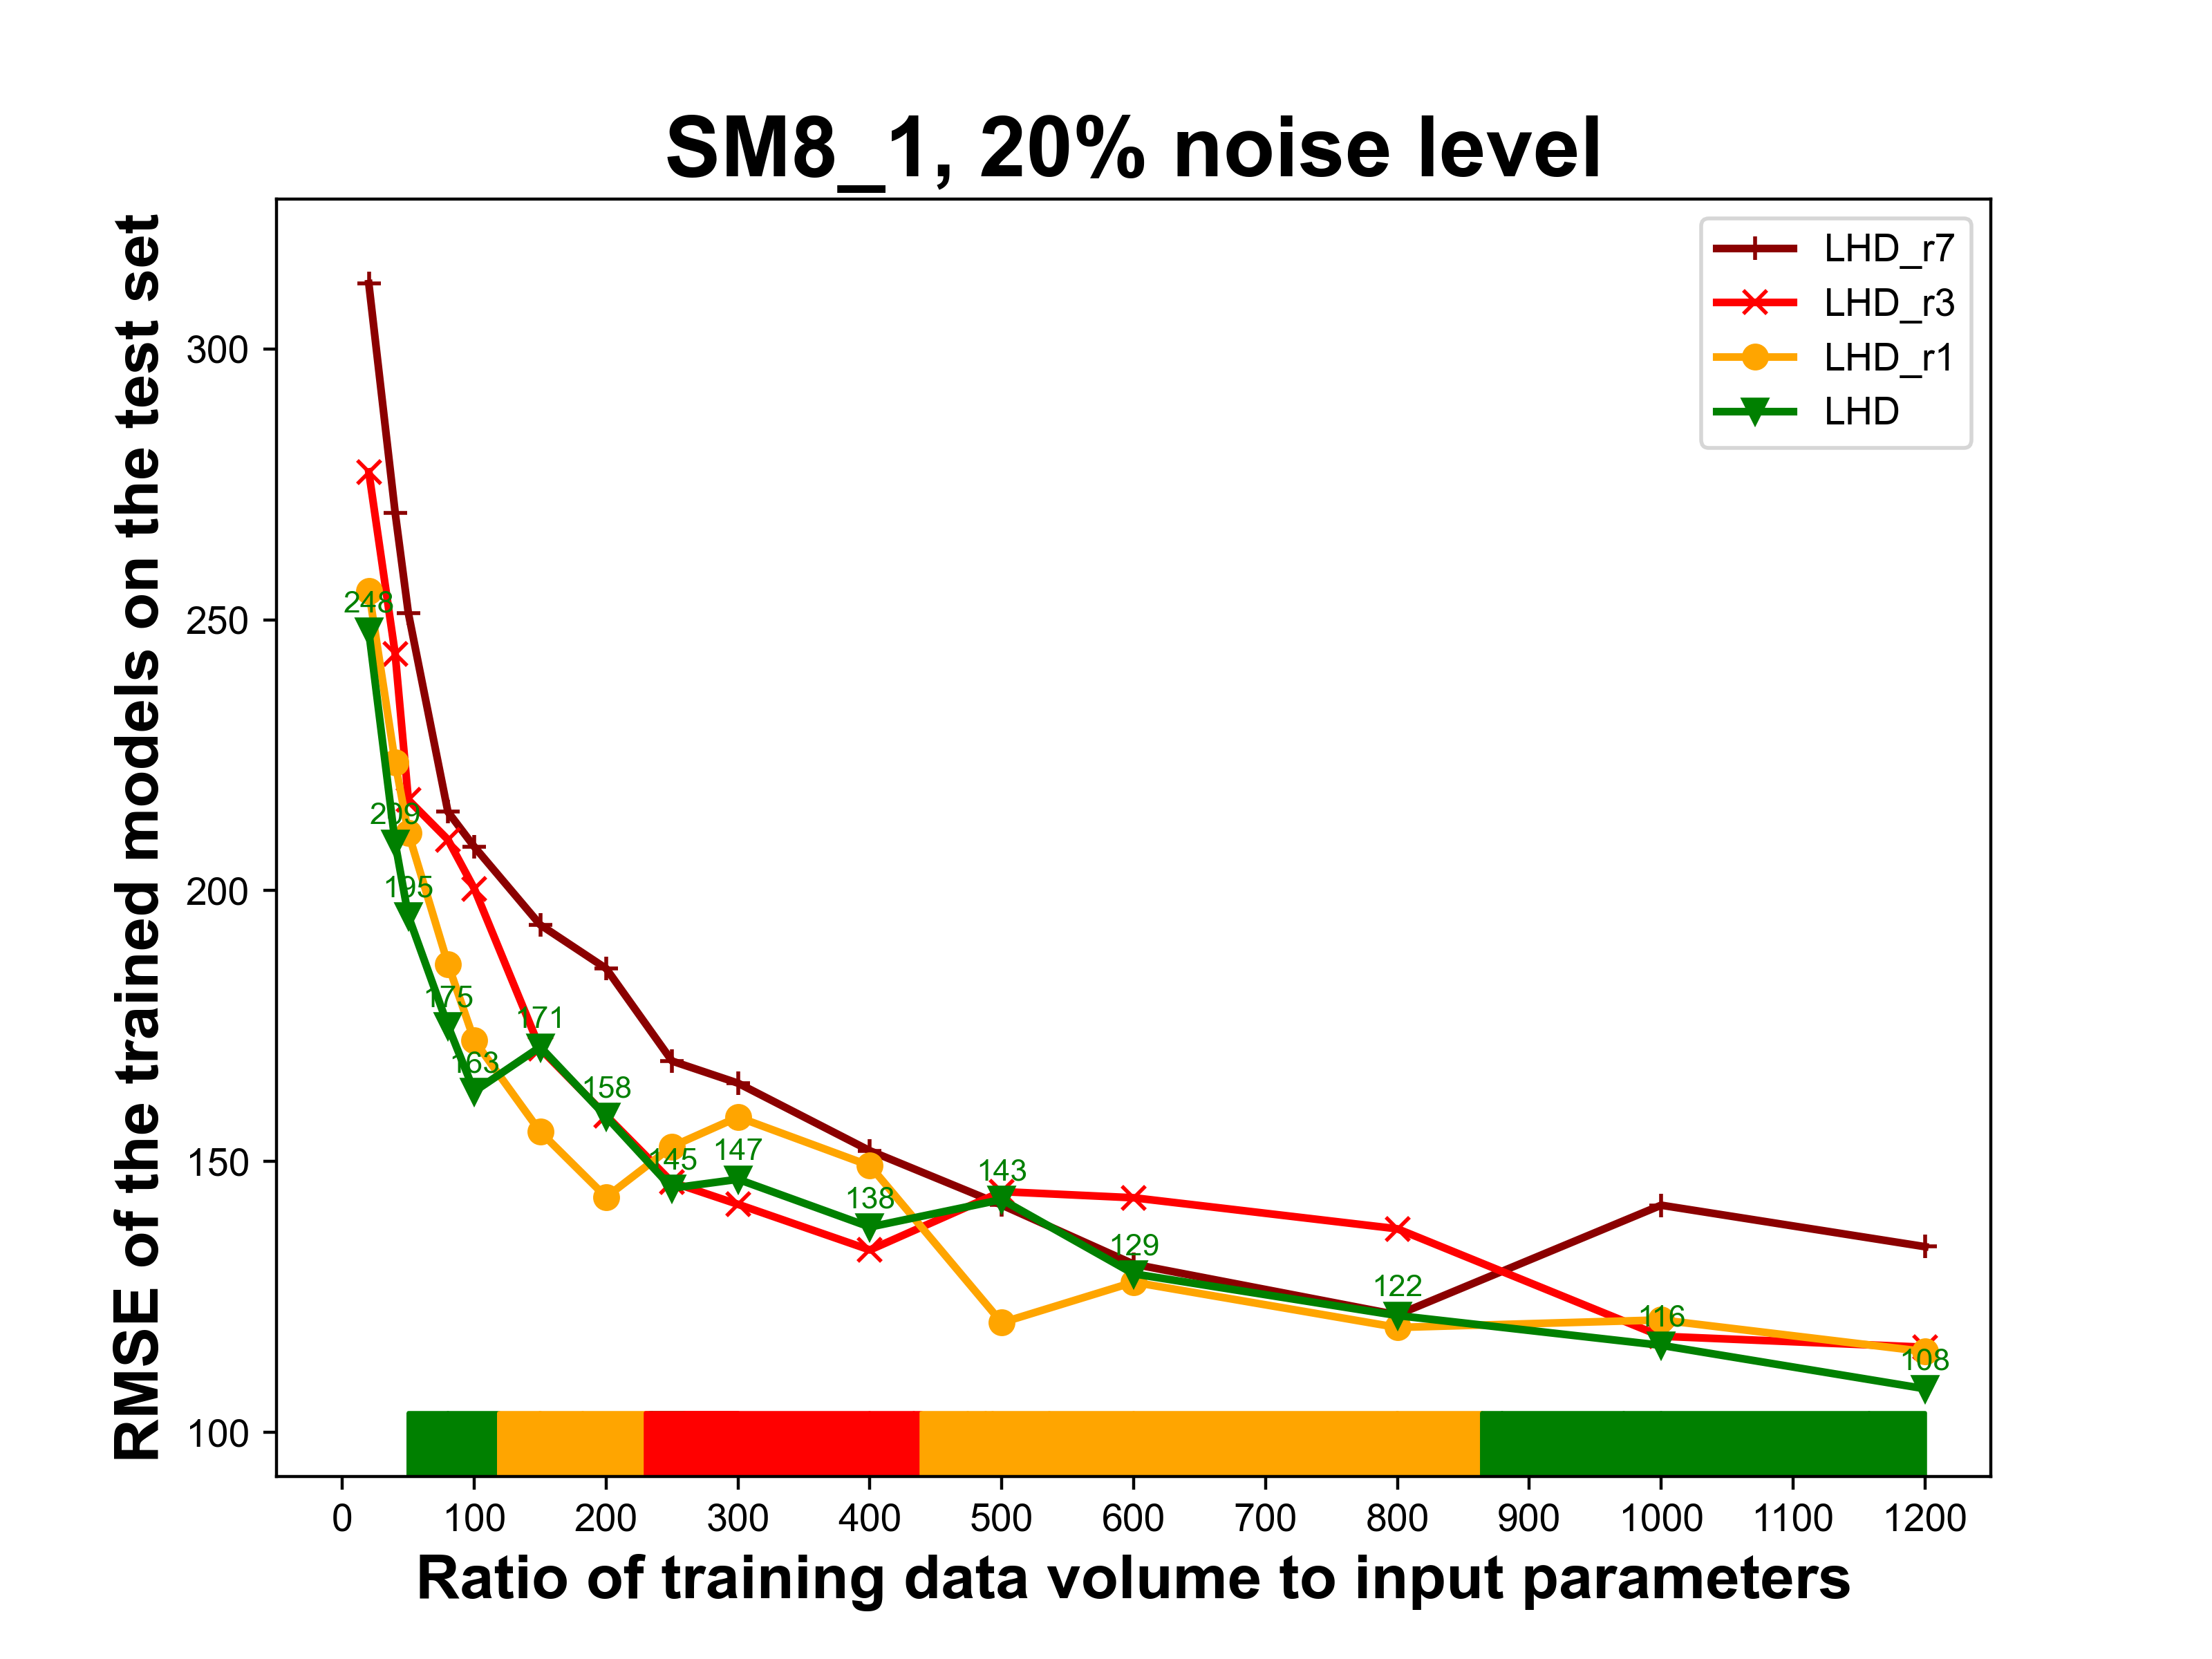


Supplementary Figure 5. Replication in data distribution versus only sampling with new data points, SM8_1, 20% noise level. The color bar illustrates the best performing DOE strategy.


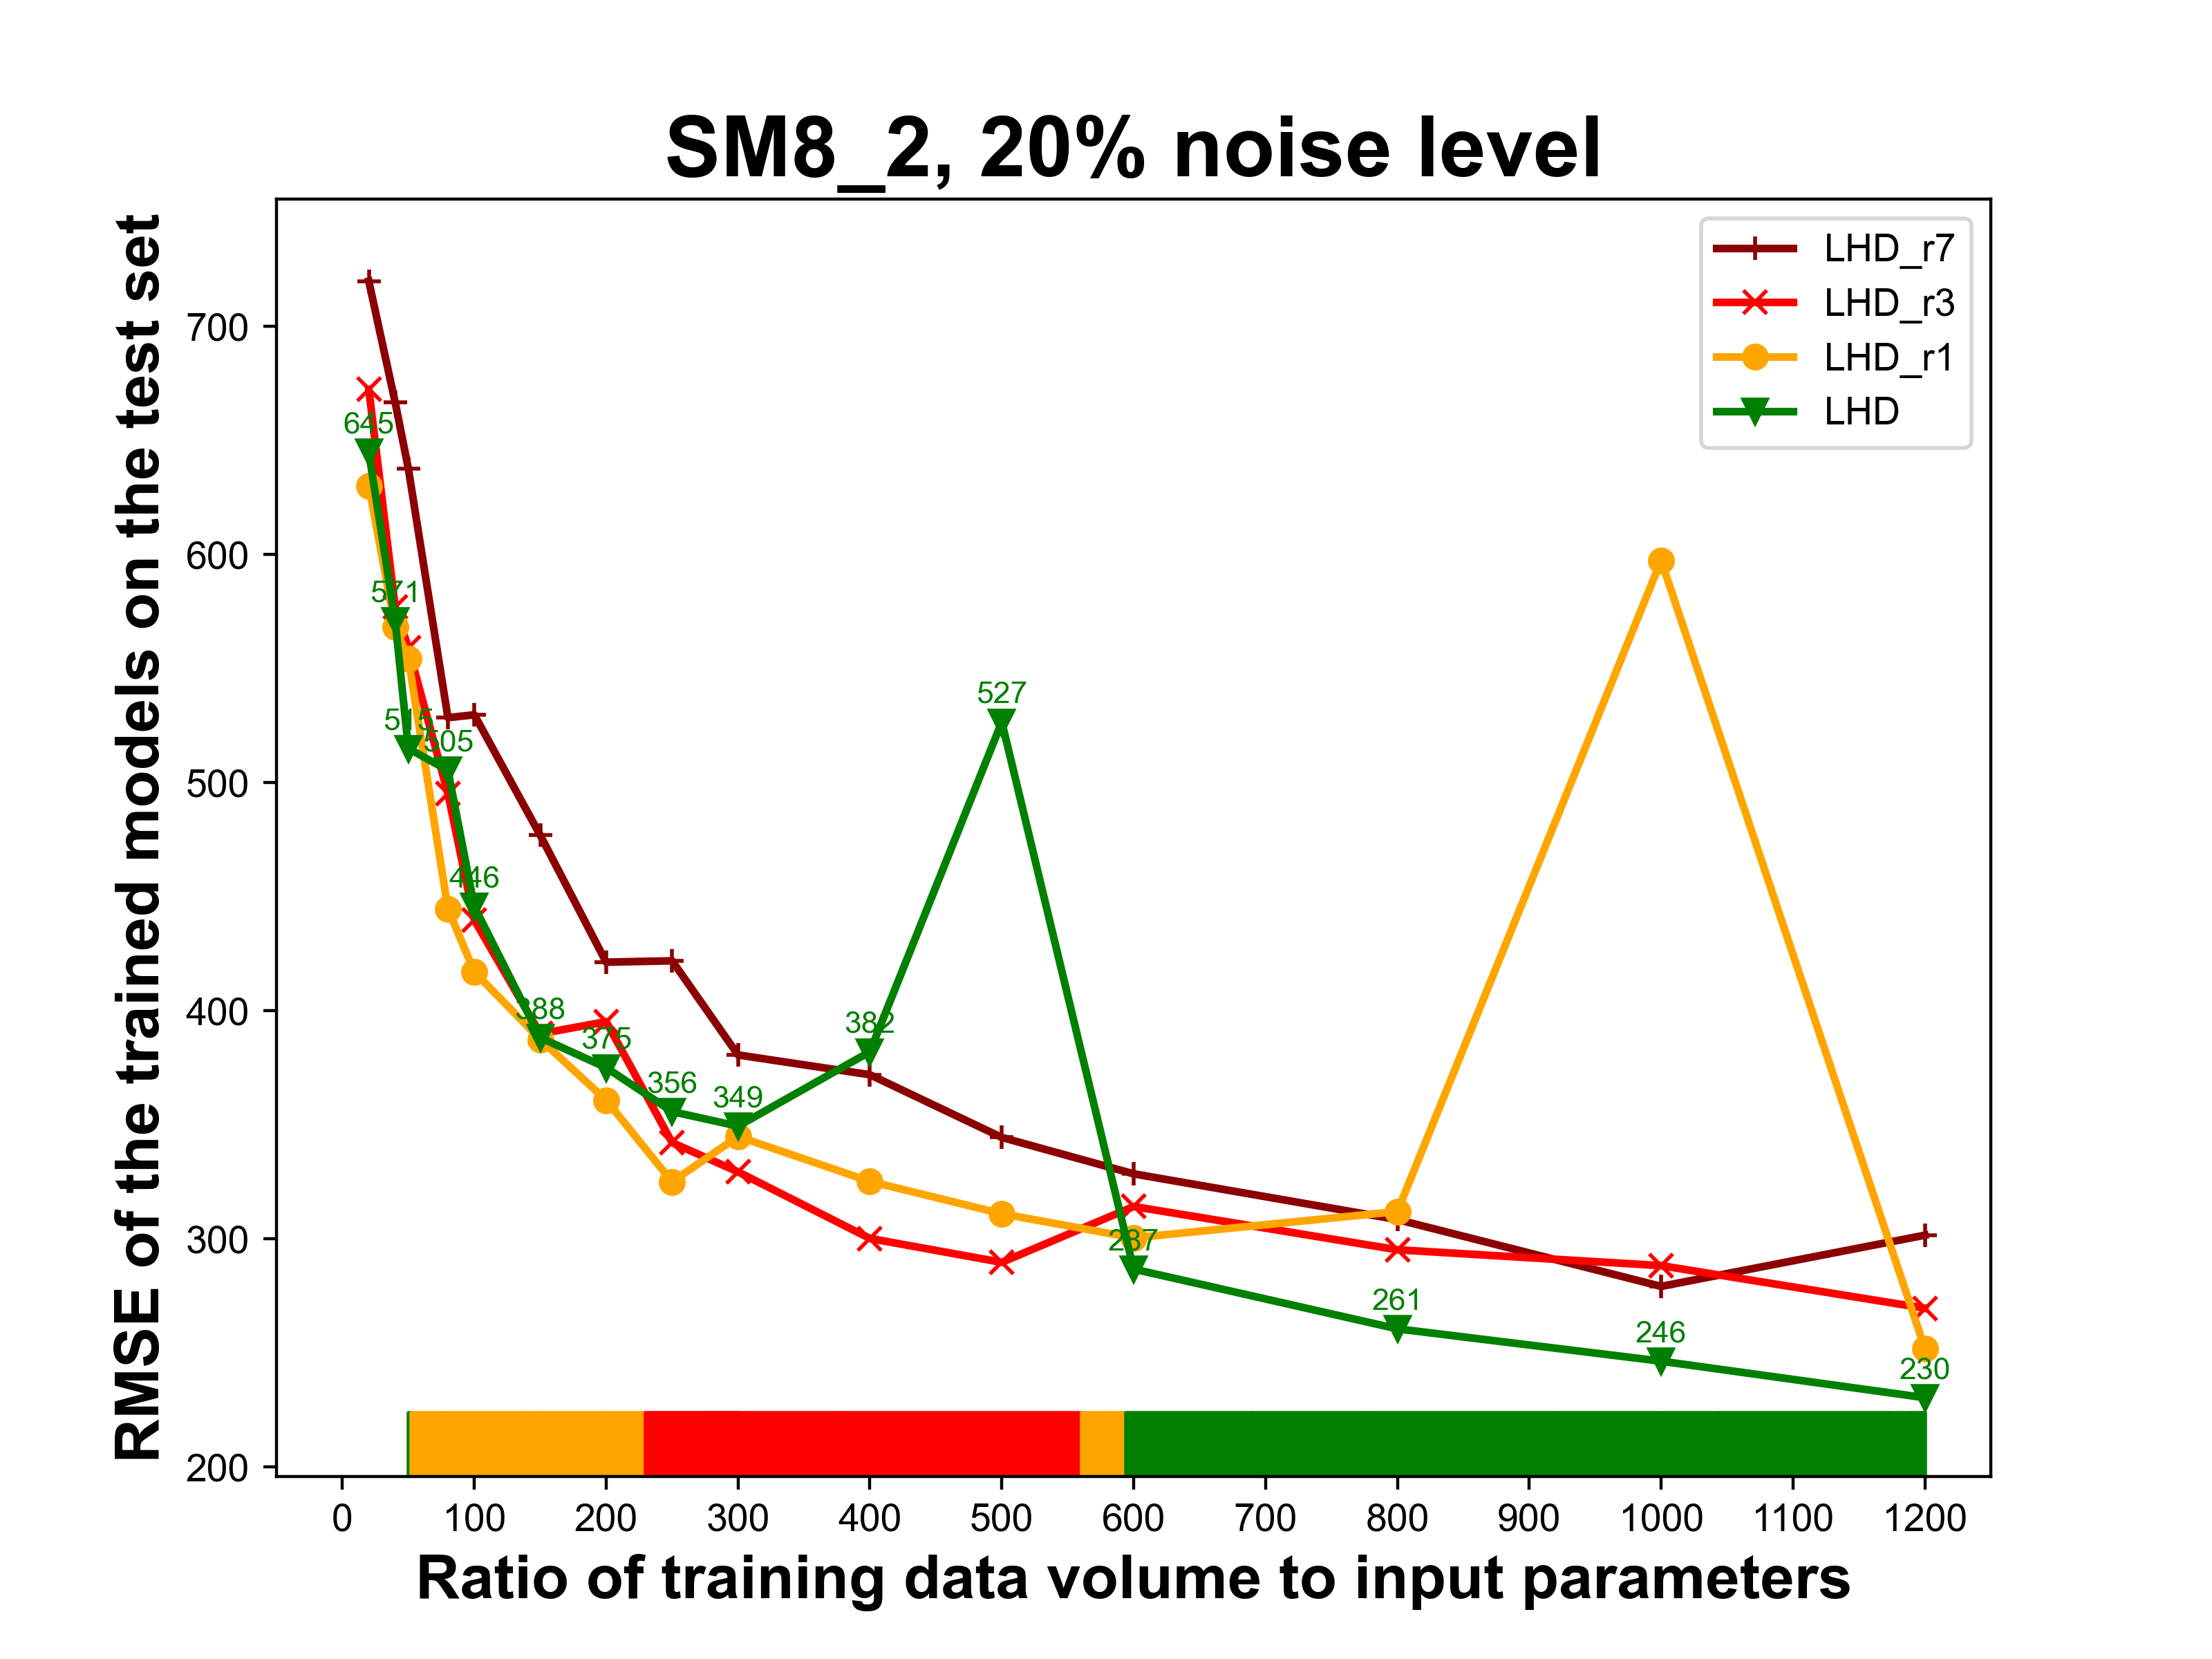


Supplementary Figure 6. Replication in data distribution versus only sampling with new data points, SM8_2, 20% noise level. The color bar illustrates the best performing DOE strategy.


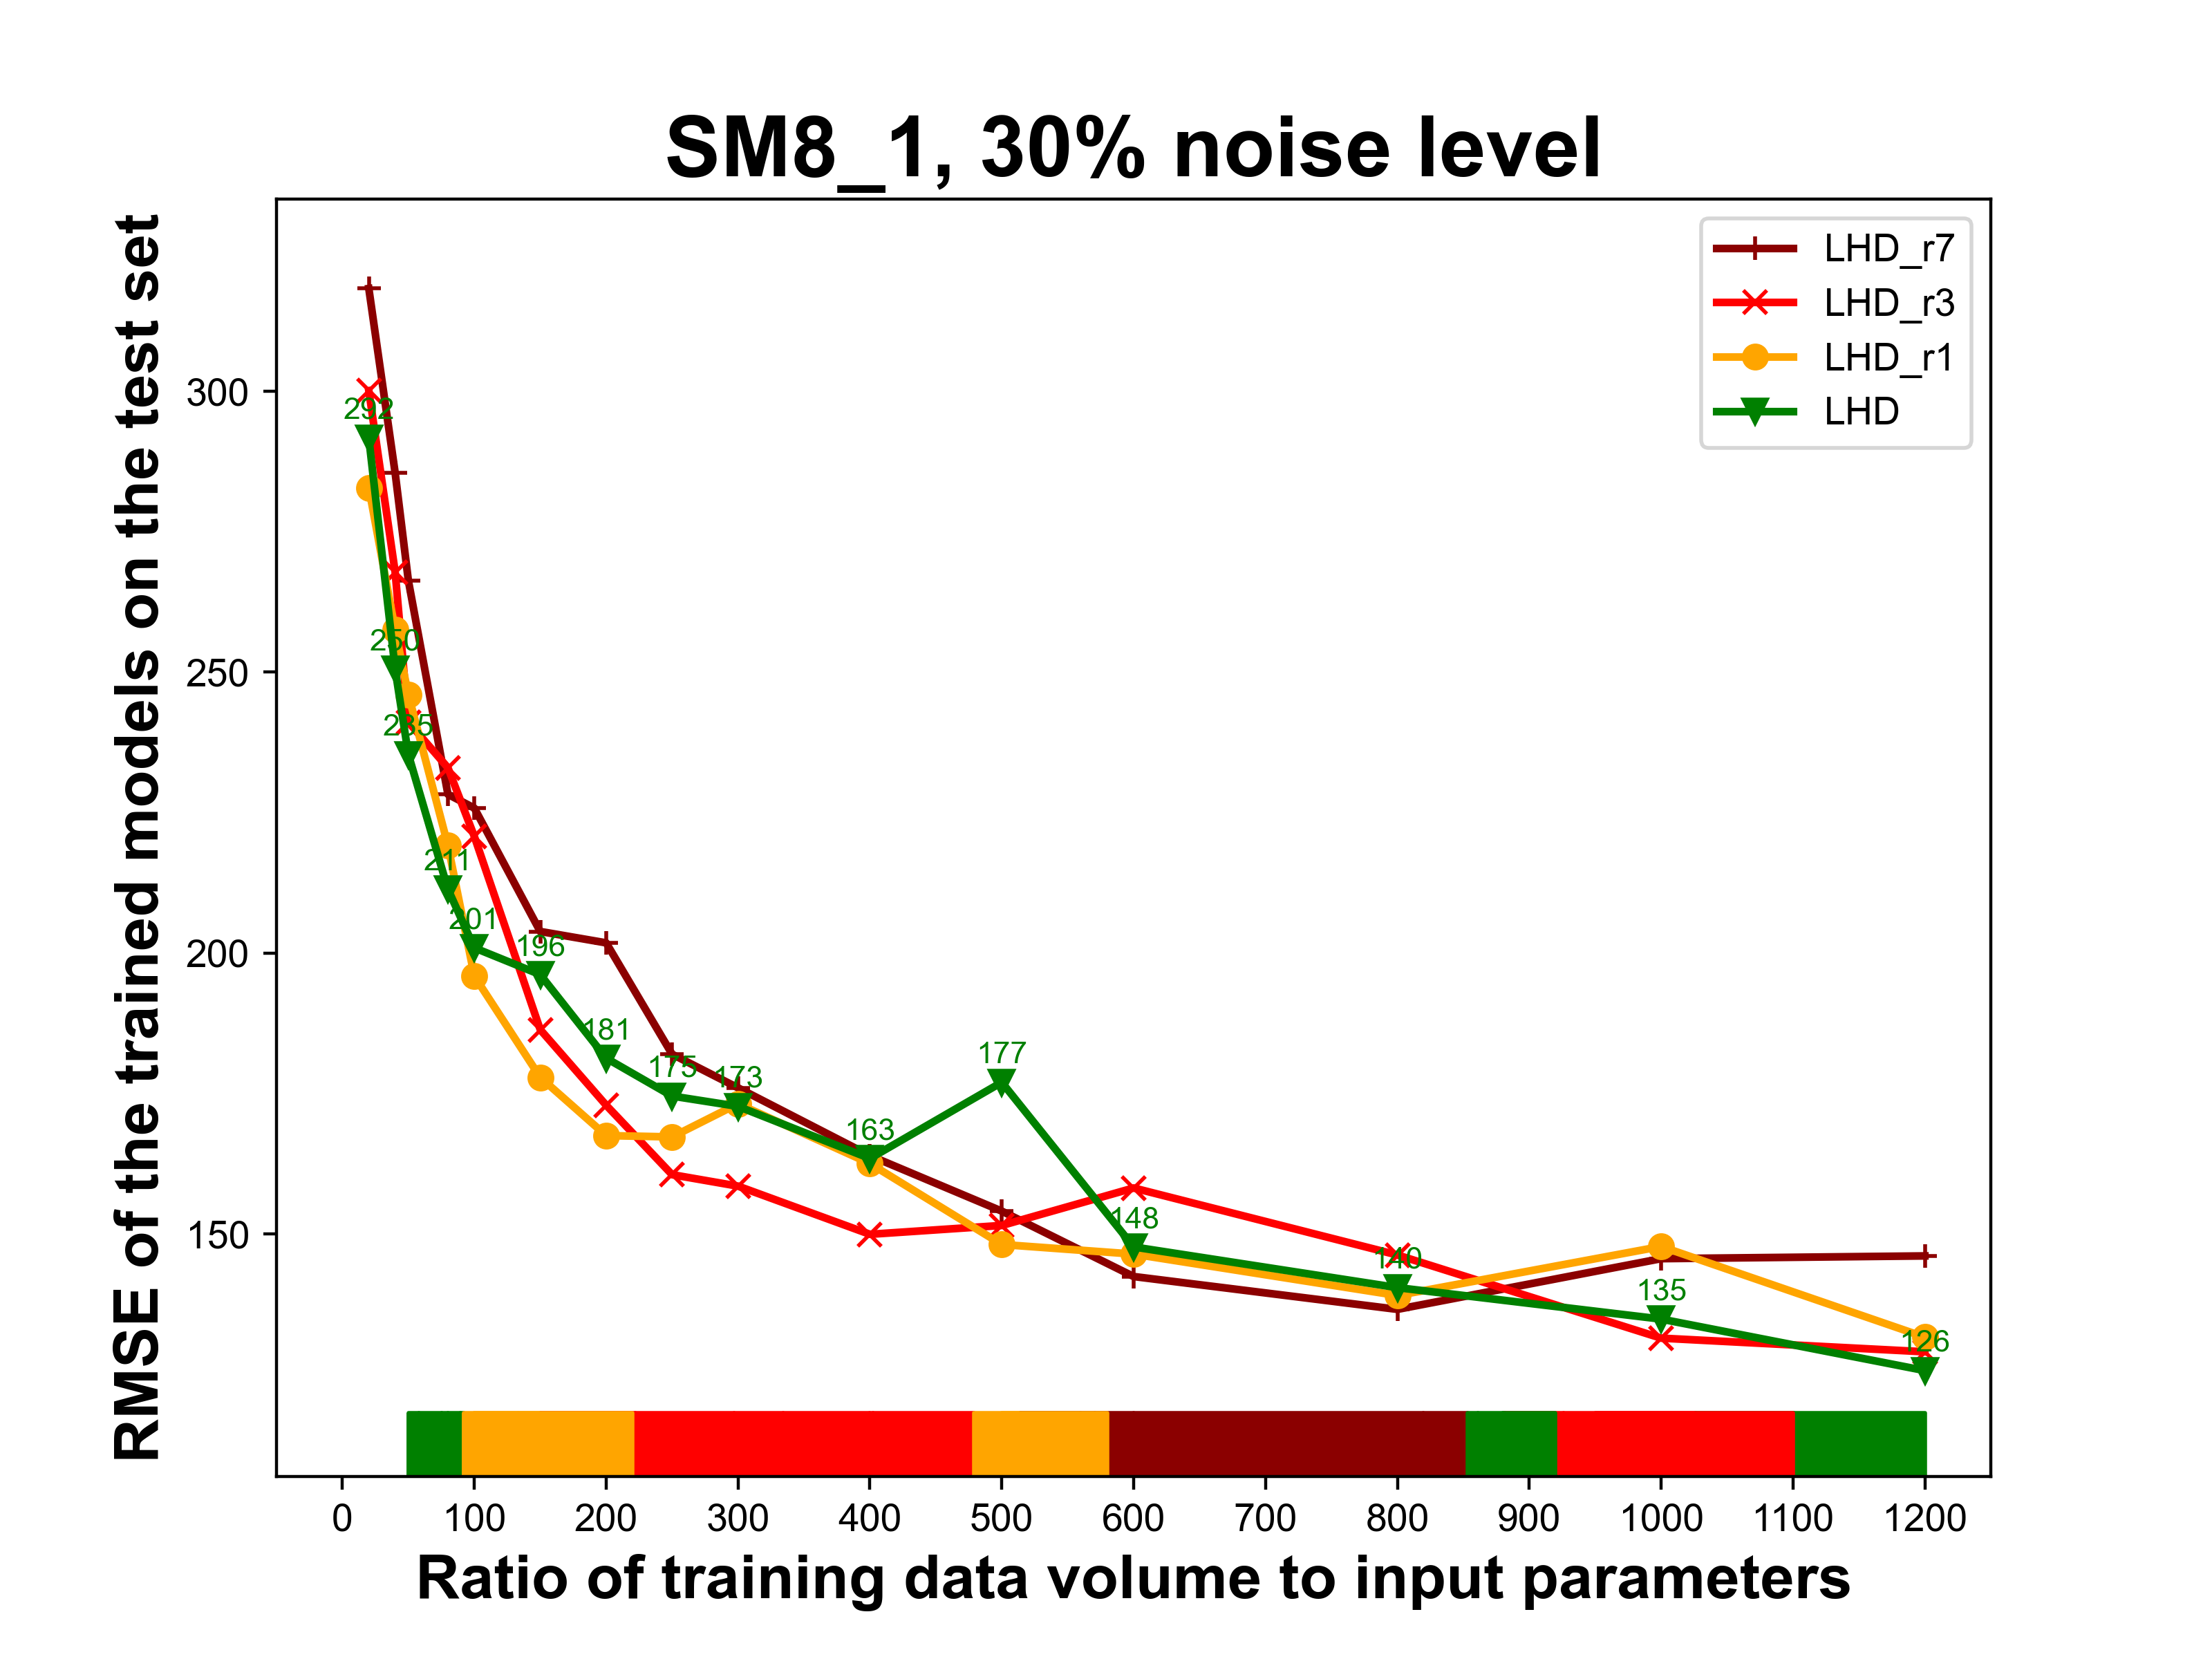


Supplementary Figure 7. Replication in data distribution versus only sampling with new data points, SM8_1, 30% noise level. The color bar illustrates the best performing DOE strategy.


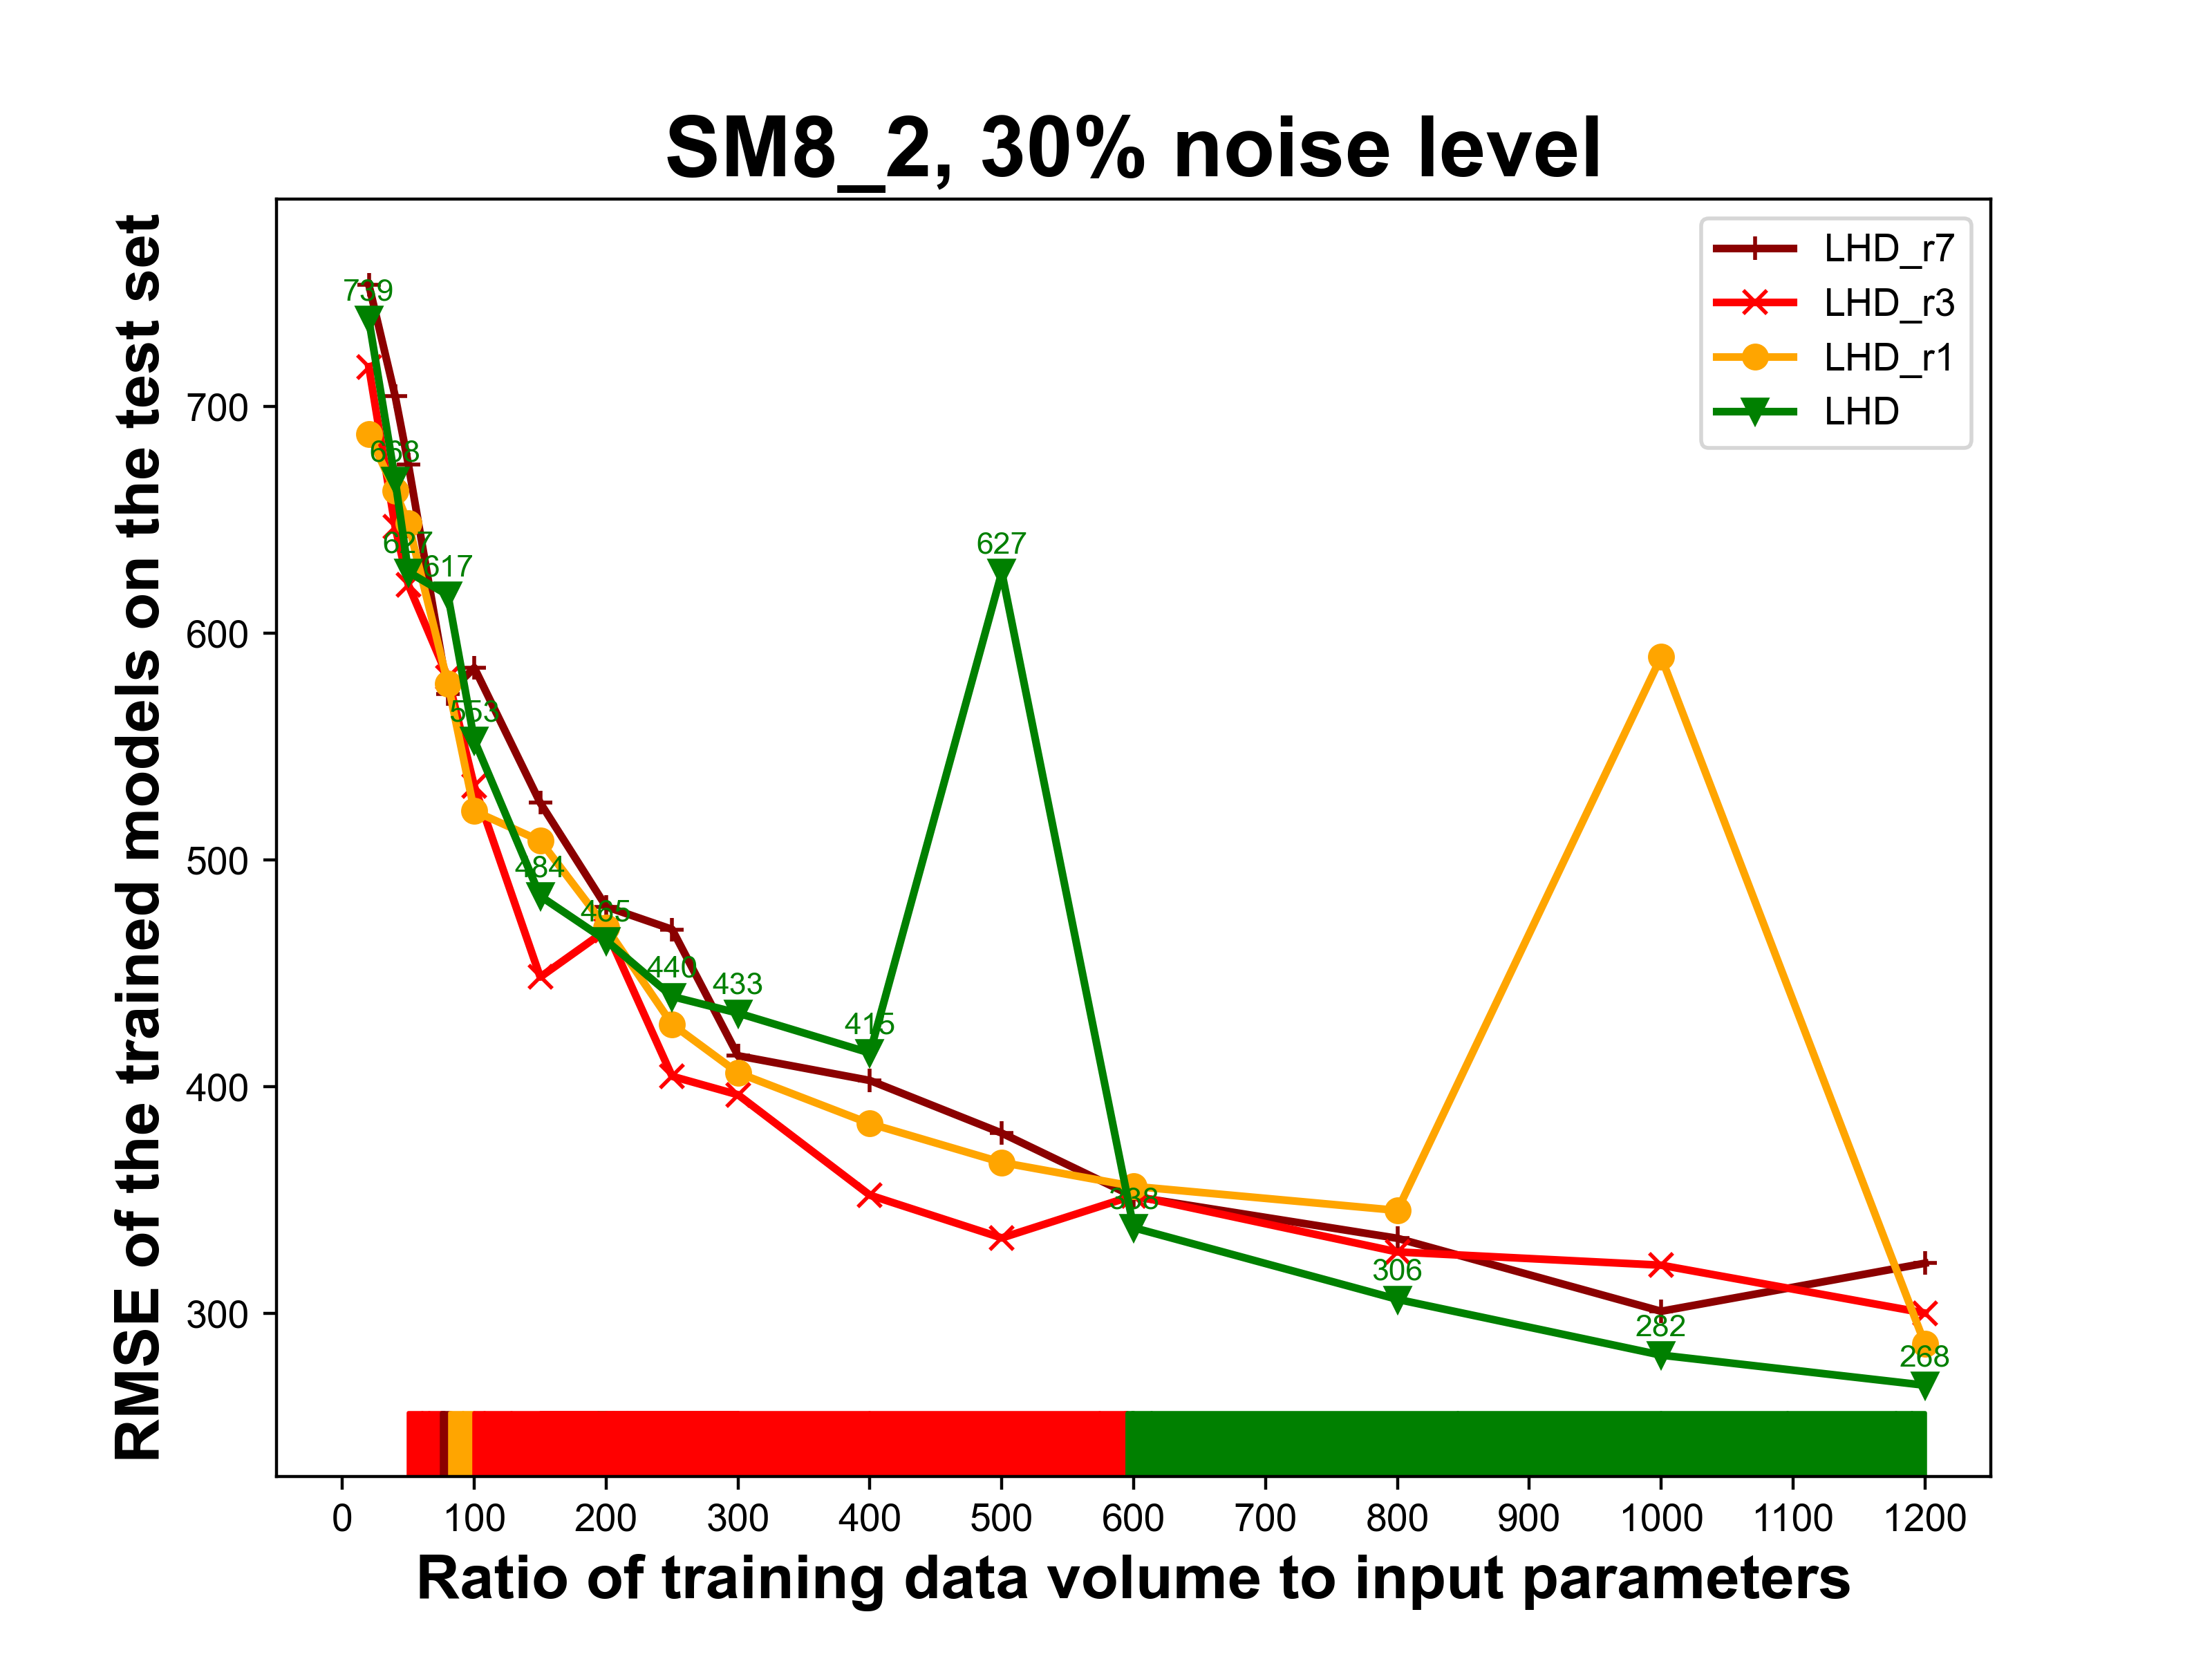


Supplementary Figure 8. Replication in data distribution versus only sampling with new data points, SM8_2, 30% noise level. The color bar illustrates the best performing DOE strategy.
